# Supplementary material
Source: publisher figshare collection journal article supplement (https://gsajournals.figshare.com/articles/dataset/_/7093799)
Supplement: Supplementary file 1 [file 1]

Table comparing the syntenry identified between North American Lake Whitefish (*Coregonus clupeaformis*) and Atlantic Salmon (*Salmo salar*) by Sutherland et al. (2016) using MapComp and our identified syntenry between pre-alpine whitefish (*C. sp. "Albock"*) and Atlantic salmon using a mapping approach

| Lake Whitefish (Gagnaire et al. 2013) | Atlantic Salmon | C. sp. Albock "Calb" | C. sp. Albock "W" |
|---------------------------------------|-----------------|----------------------|-------------------|
| Cclu22                                | Ssa01a          | Calb10               | W01               |
| <b>Cclu05b?</b>                       | <b>Ssa01b</b>   | <b>Calb01</b>        | <b>W02</b>        |
| Cclu04b                               | Ssa01c          | Calb02               | W03               |
| <b>Cclu01a<sub>a</sub>?</b>           | <b>Ssa02a</b>   | <b>NA</b>            | <b>NA</b>         |
| <b>Cclu06b</b>                        | <b>Ssa02b</b>   | <b>NA</b>            | <b>NA</b>         |
| Cclu26                                | Ssa03a          | Calb22               | W04               |
| <b>missing</b>                        | <b>Ssa03b</b>   | <b>Calb34</b>        | <b>W05</b>        |
| <b>missing</b>                        | <b>Ssa04a</b>   | <b>Calb07</b>        | <b>W06</b>        |
| Cclu08                                | Ssa04b          | Calb39               | W07               |
| Cclu29                                | Ssa05a          | Calb30               | W08               |
| <b>Cclu01a<sub>a</sub>?</b>           | <b>Ssa05b</b>   | <b>NA</b>            | <b>NA</b>         |
| Cclu18                                | Ssa06a          | Calb23               | W09               |
| <b>Cclu17</b>                         | <b>Ssa06b</b>   | <b>NA</b>            | <b>NA</b>         |
| Cclu24b                               | Ssa07a          | Calb09               | W10               |
| <b>Cclu02<sub>a</sub></b>             | <b>Ssa07b</b>   | <b>NA</b>            | <b>NA</b>         |
| <b>missing</b>                        | <b>Ssa08</b>    | <b>missing</b>       | <b>missing</b>    |
| Cclu31                                | Ssa09a          | Calb18               | W11               |
| Cclu16                                | Ssa09b          | Calb29               | W12               |
| Cclu35                                | Ssa09c          | Calb33               | W13               |
| Cclu06a                               | Ssa10a          | Calb08               | W14               |
| Cclu30                                | Ssa10b          | Calb04               | W15               |
| <b>Cclu04a?</b>                       | <b>Ssa11a</b>   | <b>Calb11</b>        | <b>W16</b>        |
| Cclu33                                | Ssa11b          | Calb37               | W17               |
| Cclu38b                               | Ssa12a          | Calb05               | W18               |
| <b>Cclu38a</b>                        | <b>Ssa12b</b>   | <b>NA</b>            | <b>NA</b>         |
| Cclu27                                | Ssa13a          | Calb14               | W19               |
| Cclu13                                | Ssa13b          | Calb06               | W20               |
| Cclu25                                | Ssa14a          | Calb19               | W21               |
| <b>Cclu24a</b>                        | <b>Ssa14b</b>   | <b>NA</b>            | <b>NA</b>         |
| Cclu40                                | Ssa15a          | Calb24               | W22               |
| Cclu14                                | Ssa15b          | Calb28               | W23               |
| Cclu11                                | Ssa16a          | Calb15               | W24               |
| Cclu19?                               | Ssa16b          | Calb38               | W25               |
| Cclu19?                               | Ssa17a          | Calb36               | W26               |
| <b>Cclu01b<sub>a</sub></b>            | <b>Ssa17b</b>   | <b>NA</b>            | <b>NA</b>         |
| Cclu05b?                              | Ssa18a          | Calb27               | W27               |
| Cclu23                                | Ssa18b          | Calb32               | W28               |
| Cclu39                                | Ssa19a          | Calb26               | W29               |
| <b>Cclu05a</b>                        | <b>Ssa19b</b>   | <b>NA</b>            | <b>NA</b>         |
| Cclu37                                | Ssa20a          | Calb31               | W30               |
| Cclu28                                | Ssa20b          | Calb16               | W31               |
| <b>Cclu02 + 03</b>                    | <b>Ssa21</b>    | <b>Calb03</b>        | <b>W32</b>        |
| Cclu21                                | Ssa22           | Calb12               | W33               |
| Cclu36                                | Ssa23           | Calb17               | W34               |
| Cclu34                                | Ssa24           | Calb25               | W35               |
| Cclu32                                | Ssa25           | Calb21               | W36               |
| <b>Cclu04a?</b>                       | <b>Ssa26</b>    | <b>NA</b>            | <b>NA</b>         |
| Cclu10                                | Ssa27           | Calb20               | W37               |
| <b>Cclu15</b>                         | <b>Ssa28</b>    | <b>Calb35, Calb4</b> | <b>W38, W39</b>   |
| Cclu12                                | Ssa29           | Calb13               | W40               |
